# Supplementary material
Source: publisher figshare collection journal article supplement (https://acs.figshare.com/ndownloader/files/4320715)
Supplement: Supplementary file 1 [file 4320715]

## **Supplementary Material**

### **Fluorescent Metal Nanoshells: Lifetime-Tunable Molecular Probes in Fluorescent Cell Imaging**

Jian Zhang\*, Yi Fu , Joseph R. Lakowicz

Center for Fluorescence Spectroscopy, University of Maryland School of Medicine,  
Department of Biochemistry and Molecular Biology, 725 West Lombard Street,  
Baltimore, MD 21201.

Submitted to Journal of Physical Chemistry C

Email: [jian@cfs.biomet.umaryland.edu](mailto:jian@cfs.biomet.umaryland.edu)

Tel: 410-706-7500

Fax: 410-706-8409

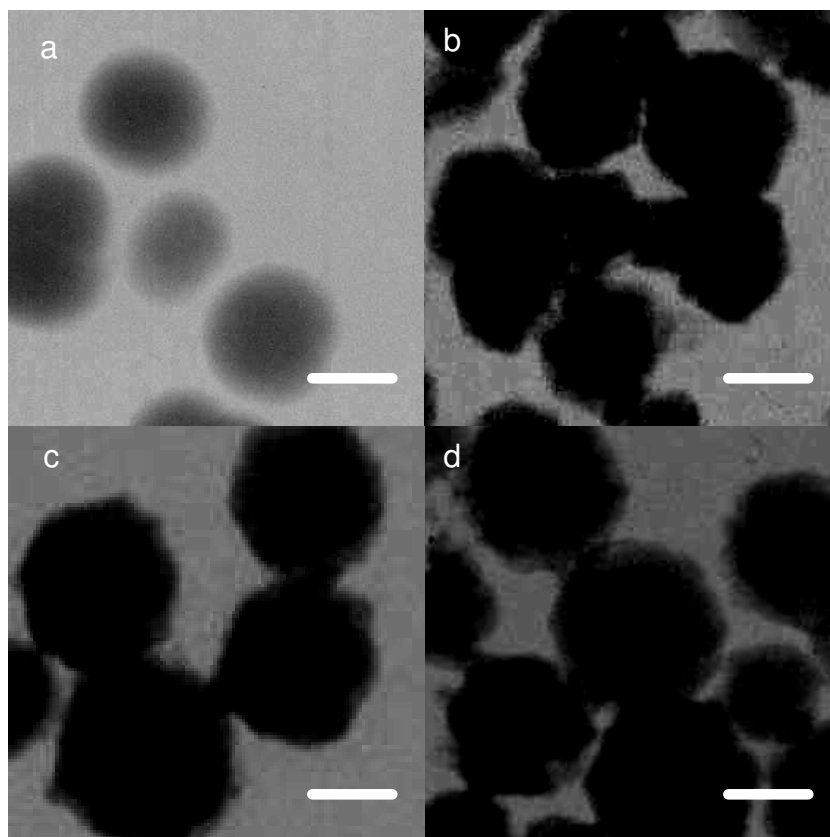

Figure S1. TEM images of (a) metal free silica spheres and metal nanoshells with (b)  $\text{Ru}(\text{phen-NH}_2)_3^{2+}$ , (c)  $\text{Ru}(\text{bpy})_3^{2+}$ , and (d)  $\text{Ru}(\text{dpp})_3^{2+}$ -complex encapsulations in the cores. The scale bar is 50 nm.

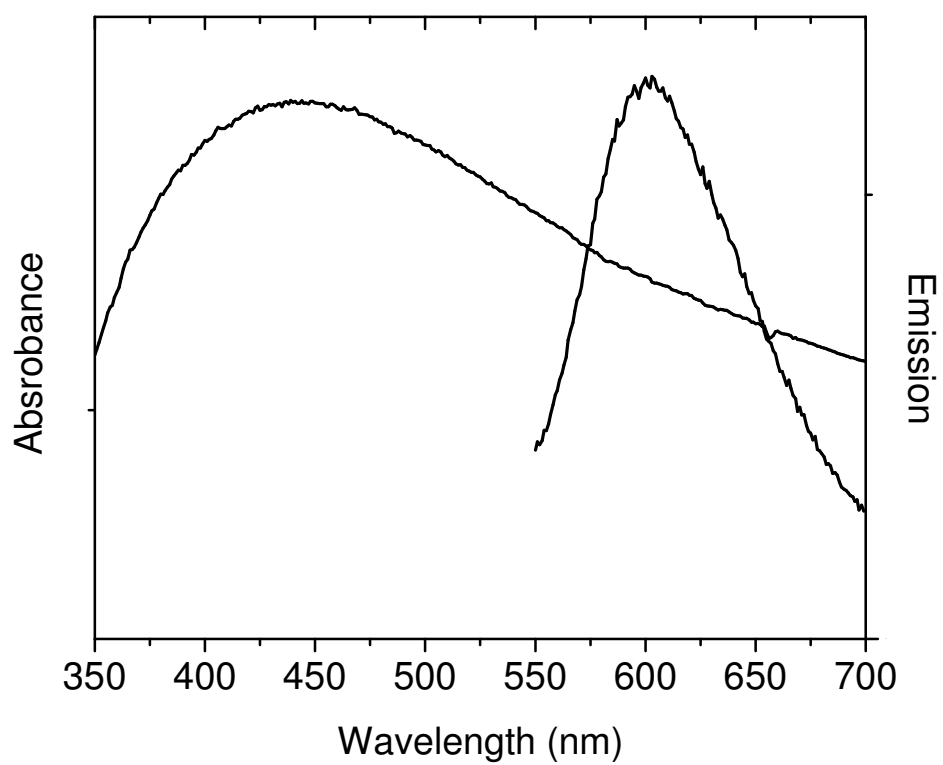

Figure S2. Absorbance and ensemble fluorescence spectra of metal nanoshells with the  $\text{Ru}(\text{phen-NH}_2)_3^{2+}$  complex encapsulations in 10 mM PBS solution. The emission spectrum was determined upon the excitation at 450 nm.

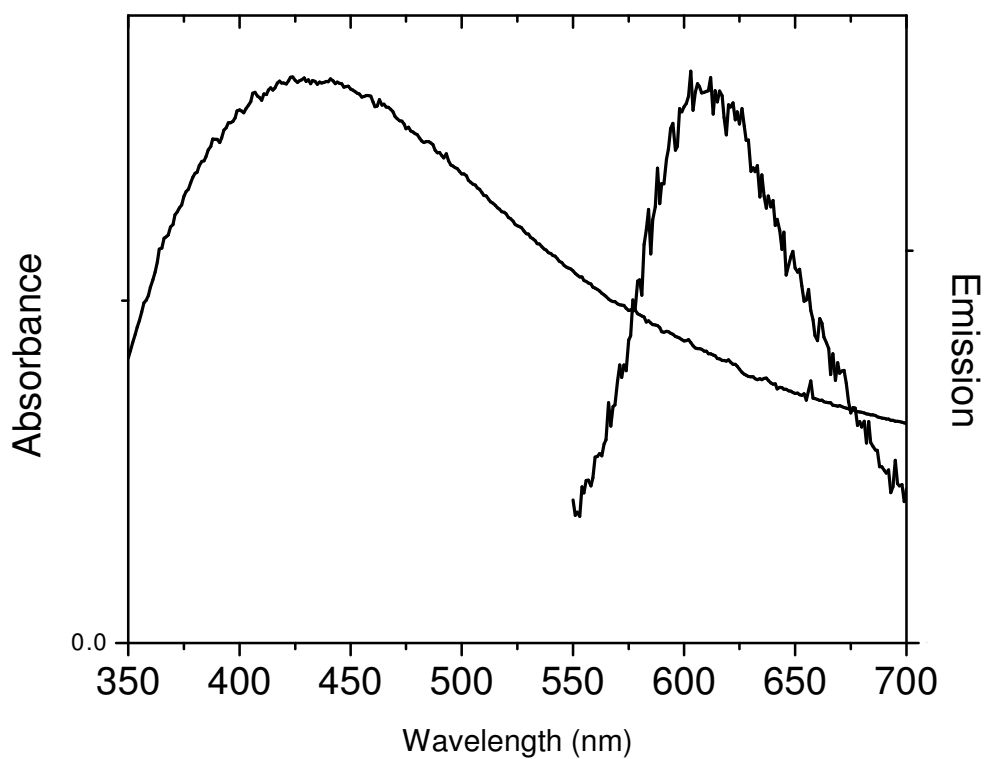

Figure S3. Absorbance and ensemble fluorescence spectra of metal nanoshells with the  $\text{Ru}(\text{bpy})_3^{2+}$  complex encapsulations in 10 mM PBS solution. The emission spectrum was determined upon the excitation at 450 nm.

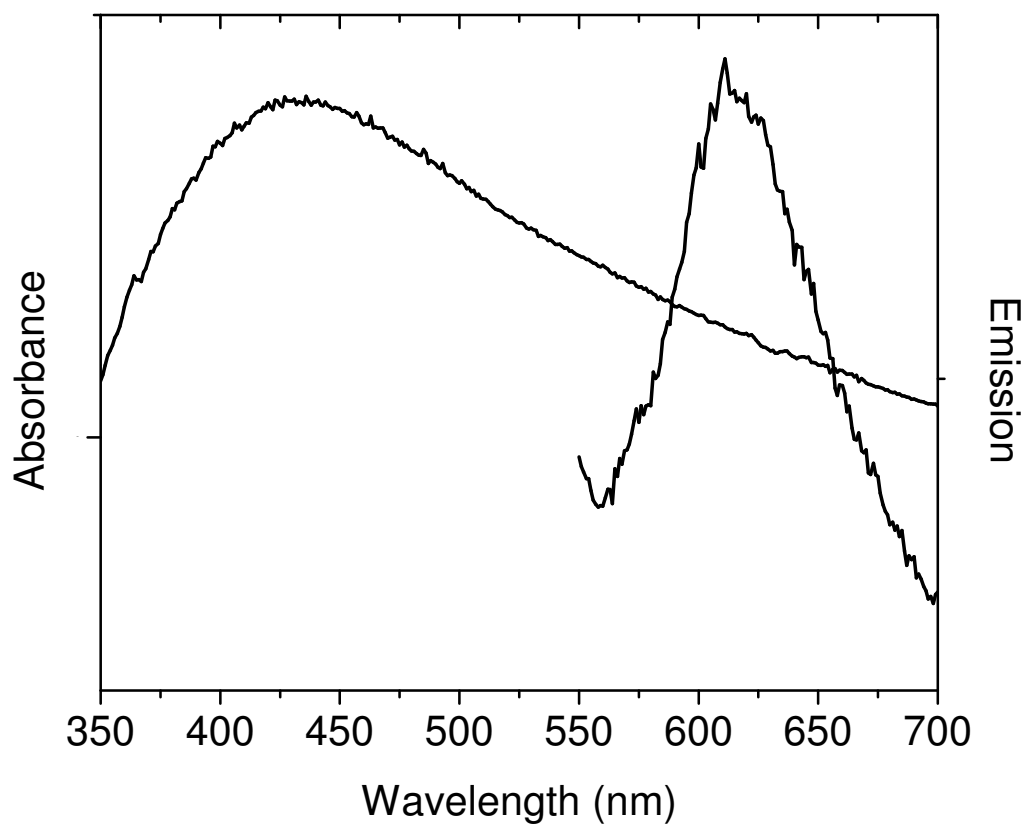

Figure S4. Absorbance and ensemble fluorescence spectra of metal nanoshells with the Ru(dpp)<sub>3</sub><sup>2+</sup> complex encapsulations in 10 mM PBS solution. The emission spectrum was determined upon the excitation at 450 nm.
